# Supplementary material for: Investigation on crystal structure, phase transition behavior, and structural geometries of organic-inorganic hybrid [N(C3H7)4]2ZnBr4
Source: Research Square preprint supplement (doi:10.21203/rs.3.rs-8654223/v1), 2026-02-02
Supplement: Supplementary file 1 [file 5aa0fdaa3c96405264ea9c81.docx]

**Table**. The bond-lengths (Å) and bond-angles (°) for [N(C3H7)4]2ZnBr4 at 300 K.

| Br(1)-Zn(1)  Br(2)-Zn(1)  Br(3)-Zn(1) | 2.4149(7)  2.4342(7)  2.4229(8) | C(23B)-C(24)  C(1)-H  C(2)-H | 1.60(2)  0.97  0.97 | C(1)-N(1)-C(7)  C(4)-N(1)-C(7)  C(13)-N(2)-C(13)#1 | | 109.5(3)  107.2(3)  107.0(5) |
| --- | --- | --- | --- | --- | --- | --- |
| Br(4)-Zn(1) | 2.4057(7) | C(3)-H | 0.96 | C(13)-N(2)-C(16) | | 110.7(2) | |
| N(1)-C(10) | 1.508(5) | C(4)-H | 0.97 | C(13)#1-N(2)-C(16) | | 110.8(2) | |
| N(1)-C(1)  N(1)-C(4)  N(1)-C(7) | 1.516(5)  1.519(5)  1.533(6) | C(5)-H  C(6)-H  C(7)-H | 0.97  0.96  0.97 | C(13)-N(2)-C(16)#1  C(13)#1-N(2)-C(16)#1  C(16)-N(2)-C(16)#1 | | 110.8(2)  110.7(2)  107.0(4) | |
| N(2)-C(13) | 1.518(5) | C(8)-H | 0.97 | C(19)#2-N(3)-C(19) | | 114.0(8) | |
| N(2)-C(13)#1 | 1.518(5) | C(9)-H | 0.96 | C(19)#2-N(3)-C(22) | | 106.8(6) | |
| N(2)-C(16) | 1.518(5) | C(10)-H | 0.97 | C(19)-N(3)-C(22) | | 108.2(5) | |
| N(2)-C(16)#1 | 1.518(5) | C(11)-H | 0.97 | C(19)#2-N(3)-C(22)#2 | | 108.2(5) | |
| N(3)-C(19)#2 | 1.465(8) | C(12)-H | 0.96 | C(19)-N(3)-C(22)#2 | | 106.8(6) | |
| N(3)-C(19) | 1.465(8) | C(13)-H | 0.97 | C(22)-N(3)-C(22)#2 | | 112.9(9) | |
| N(3)-C(22) | 1.467(8) | C(14)-H | 0.97 | C(2)-C(1)-N(1) | | 116.6(4) | |
| N(3)-C(22)#2 | 1.467(8) | C(15)-H | 0.96 | C(1)-C(2)-C(3) | | 110.3(5) | |
| C(1)-C(2) | 1.468(7) | C(16)-H | 0.97 | C(5)-C(4)-N(1) | | 117.5(4) | |
| C(2)-C(3) | 1.537(7) | C(17)-H | 0.97 | C(4)-C(5)-C(6) | | 110.4(4) | |
| C(4)-C(5) | 1.501(6) | C(18)-H | 0.96 | C(8)-C(7)-N(1) | | 116.9(4) | |
| C(5)-C(6) | 1.509(7) | C(19)-H | 0.97 | C(7)-C(8)-C(9) | | 110.0(4) | |
| C(7)-C(8) | 1.505(7) | C(20)-H | 0.97 | C(11)-C(10)-N(1) | 116.0(4) | | |
| C(8)-C(9)  C(10)-C(11)  C(11)-C(12)  C(13)-C(14)  C(14)-C(15)  C(16)-C(17)  C(17)-C(18)  C(19)-C(20B)  C(19)-C(20A)  C(20A)-C(21)  C(20B)-C(21)  C(22)-C(23B)  C(22)-C(23A)  C(23A)-C(24) | 1.512(7)  1.496(7)  1.504(8)  1.508(7)  1.508(7)  1.513(6)  1.515(7)  1.282(14)  1.284(12)  1.525(14)  1.478(17)  1.217(16)  1.265(14)  1.456(14) | C(21)-H  C(22)-H  C(23)-H  C(24)-H  Br(4)-Zn(1)-Br(1)  Br(4)-Zn(1)-Br(3)  Br(1)-Zn(1)-Br(3)  Br(4)-Zn(1)-Br(2)  Br(1)-Zn(1)-Br(2)  Br(3)-Zn(1)-Br(2)  C(10)-N(1)-C(1)  C(10)-N(1)-C(4)  C(1)-N(1)-C(4)  C(10)-N(1)-C(7) | 0.96  0.97  0.97  0.96  108.90(3)  106.93(3)  109.61(3)  109.36(3)  109.79(3)  112.16(3)  108.5(3)  109.4(3)  111.2(3)  111.0(3) | C(10)-C(11)-C(12)  C(14)-C(13)-N(2)  C(13)-C(14)-C(15)  C(17)-C(16)-N(2)  C(16)-C(17)-C(18)  C(20B)-C(19)-N(3)  C(20A)-C(19)-N(3)  C(19)-C(20A)-C(21)  C(19)-C(20B)-C(21)  C(23B)-C(22)-N(3)  C(23A)-C(22)-N(3)  C(22)-C(23A)-C(24)  C(22)-C(23B)-C(24) | 110.3(5)  116.4(4)  110.5(5)  115.8(4)  110.2(4)  143.5(10)  135.0(10)  117.8(11)  121.4(16)  140.5(15)  148.6(12)  125.4(16)  117.9(17) | | |
